# Supplementary material
Source: PubMed Central journal article supplement (PMC10181875)
Supplement: NIHMS1870959-supplement-1.pdf [file NIHMS1870959-supplement-1.pdf]

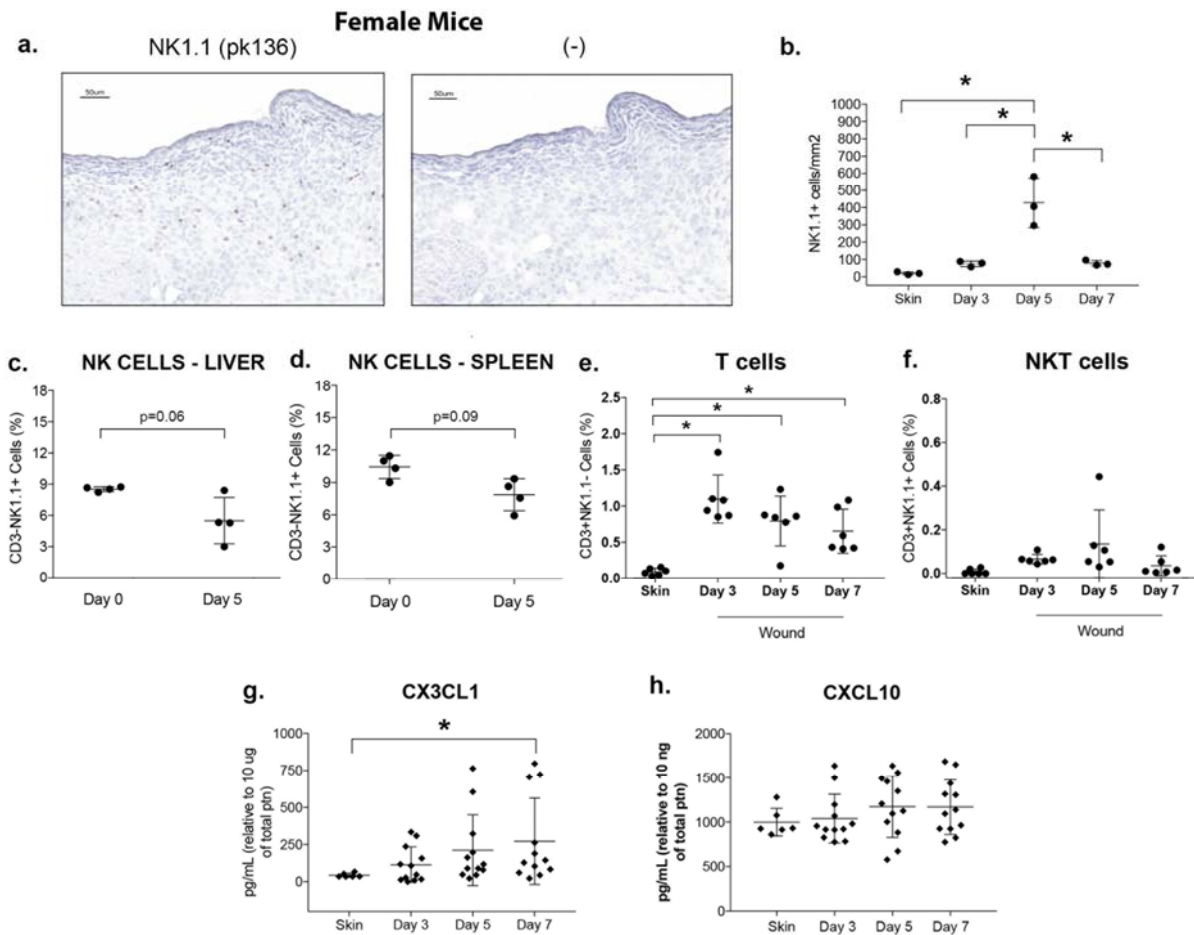

**Supplementary Figure 1.** (a) NK cells assessed in cryosections by immunohistochemical staining for NK1.1 (pk136) in female mice and (b) corresponding summary data for cell counts. Summary data for levels of NK cells (CD3-NK1.1+) in (c) liver and (d) spleen, (e) T cells (CD3+NK1.1-) and (f) NKT cells (CD3+NK1.1+) in uninjured skin and wounds, assessed by flow cytometry over the course of wound healing. Summary data for protein levels of (g) CX3CL1 and (h) CXCL10 in wounds assessed in wound homogenates by flow cytometry multiplex assay. For each data set, one-way ANOVA and Tukey's multiple comparisons test were performed. \* indicates significant difference between groups at indicated specific time point ( $p < 0.05$ ).

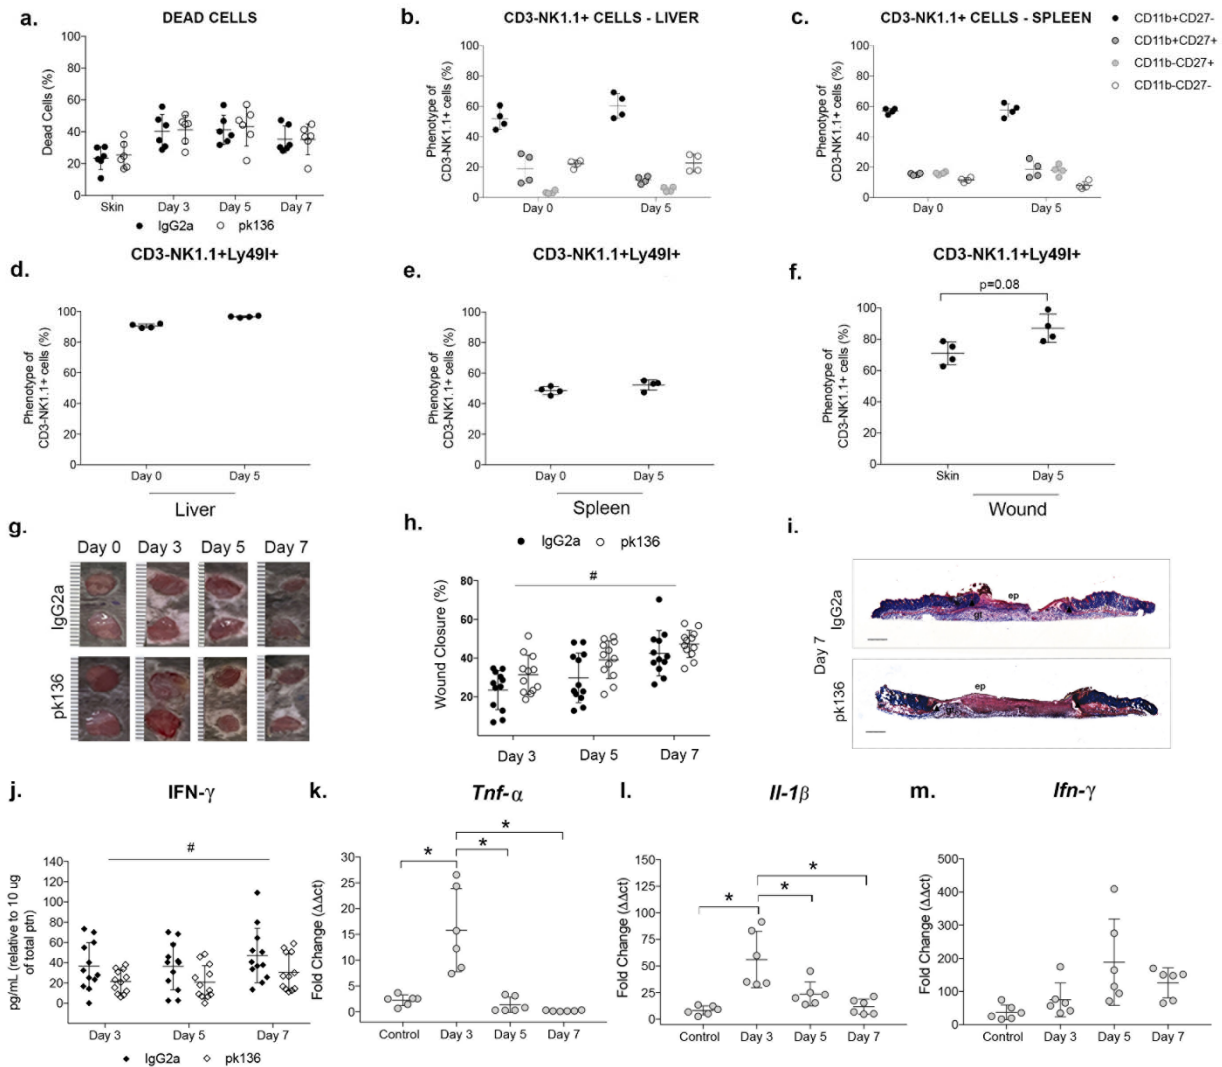

**Supplementary Figure 2.** Summary data for dead cells in skin and wounds over the course of healing (a). Phenotype of NK cells (CD3-NK1.1+) based on expression of CD11b and CD27 in (b) liver and (c) spleen. Expression of inhibitory Ly49I receptor on NK cells (CD3-NK1.1+) in (d) liver, (e) spleen and (f) skin/wounds. Expression of inhibitory Ly49I receptor on NK cells (CD3-NK1.1+) in (d) liver, (e) spleen and (f) skin/wounds. Representative images of (g) eight-mm excisional wounds made on the dorsum of mice injected with 100ug of NK1.1(pk136) antibody or IgG2a isotype control antibody applied at days 0, 2, 4 and 7. (h) Summary data for wound closure on days 0, 3, 5 and 7 days post-wounding. (i) Representative images of trichrome stained cryosections of center of 7 day wounds. ep: epithelium; gt: granulation tissue. Arrows indicate tips of epithelial tongues migrating into wound (re-epithelization). Scale bar = 1mm. (j) Summary data for IFN- $\gamma$  assessed by flow cytometry multiplex assay. Summary data for gene expression (fold change) of inflammatory cytokines (k) *Tnf- $\alpha$* , (l) *Il-1 $\beta$* , and (m) *Ifn- $\gamma$*  in sorted NK cells (NK1.1+) from wounds. Control NK1.1+ cells sorted from spleen. For each data set, one-way ANOVA and Tukey's post hoc test or two-way ANOVA and Sidak's post hoc test were performed. # indicates significant main effect of pk136 versus isotype control antibody over all time points, \* indicates significant difference between groups at indicated time point ( $p < 0.05$ ).
